# Supplementary material
Source: PubMed Central journal article supplement (PMC9896369)
Supplement: jamaoncol-e226869-s001.pdf [file jamaoncol-e226869-s001.pdf]

## Supplemental Online Content

Buck B, Chum AP, Patel M, et al. Cardiovascular magnetic resonance imaging in patients with ibrutinib-associated cardiotoxicity. *JAMA Oncol*. Published online February 2, 2023. doi:10.1001/jamaoncol.2022.6869

**eTable 1.** Demographics and cardiac magnetic resonance imaging findings, by ibrutinib and general cancer status, respectively

**eTable 2.** Univariable predictors for subsequent arrhythmic (AF or VA) events, by cardiac magnetic resonance imaging parameter

This supplemental material has been provided by the authors to give readers additional information about their work.

**eTable 1.** Demographics and cardiac magnetic resonance imaging findings, by ibrutinib and general cancer status, respectively

| Variable                                         | Ibrutinib (n=33) | Cancer Controls (n=42) <sup>a</sup> | General Population <sup>b</sup> (n=1,231) | P-value <sup>c</sup> | P-value <sup>d</sup> |
|--------------------------------------------------|------------------|-------------------------------------|-------------------------------------------|----------------------|----------------------|
| Age, mean (SD)                                   | 64.6 (10.0)      | 60.5 (10.1)                         | 67 (9)                                    | 0.192                | 0.345                |
| BMI (kg/m <sup>2</sup> ), mean (SD)              | 29.2 (5.9)       | 29.8 (7.3)                          | 28 (5.5)                                  | 0.369                | 0.535                |
| Male Gender                                      | 23 (69.7)        | 9 (21.4)                            | 606 (49.2)                                | <0.001               | 0.043                |
| Cancer Status, n (%)                             |                  |                                     |                                           |                      |                      |
| Prior Cancer Treatment                           | 20 (60.6)        | 28 (75.7)                           | NA                                        | 0.44                 | -                    |
| Prior Anthracycline                              | 1 (3.0)          | 2 (5.4)                             | NA                                        | 0.757                | -                    |
| Prior Radiotherapy                               | 3 (9.1)          | 2 (5.4)                             | NA                                        | 0.409                | -                    |
| Traditional CVD Risk Factors, n (%) <sup>e</sup> |                  |                                     |                                           |                      |                      |
| Prior HTN                                        | 9 (27.3)         | 18 (54.5)                           | 641 (52.1)                                | 0.069                | 0.021                |
| Prior DM                                         | 4 (12.1)         | 3 (8.1)                             | 185 (15.0)                                | 0.69                 | 0.575                |
| Prior CAD                                        | 4 (12.1)         | 2 (5.4)                             | NA                                        | 0.394                | -                    |
| Prior MI                                         | 1 (3.0)          | 2 (5.4)                             | NA                                        | 0.757                | -                    |
| Prior Myocarditis                                | 0 (0.0)          | 1 (2.7)                             | NA                                        | 1.0                  | -                    |
| Prior CHF                                        | 1 (3.0)          | 1 (2.7)                             | NA                                        | 1.0                  | -                    |
| Prior AF or VAs                                  | 1 (3.0)          | 5 (38.5)                            | NA                                        | 0.152                | -                    |
| Prior Valvular Disease                           | 2 (6.1)          | 1 (2.7)                             | NA                                        | 0.387                | -                    |
| Current Smoking                                  | 1 (3.0)          | 5 (13.5)                            | 84 (6.8)                                  | 0.189                | 0.522                |
| Presenting arrhythmias on ibrutinib              | 23 (69.7)        | NA                                  | NA                                        | -                    | -                    |
| Prior AF Therapies, n (%)                        |                  |                                     |                                           |                      |                      |
| Beta-blocker                                     | 19 (57.6)        | 8 (22.2)                            | NA                                        | 0.002                | -                    |
| Prior Ablation                                   | 0 (0.0)          | 1 (7.7)                             | NA                                        | 0.152                | -                    |
| CMR Findings, mean (SD)                          |                  |                                     |                                           |                      |                      |
| LVEF (%)                                         | 56.2 (11.5)      | 54.6 (13.1)                         | 62.2 (6.45)                               | 0.900                | 0.004                |
| LVEDVi (mL/m <sup>2</sup> )                      | 78.4 (19.3)      | 69.9 (18.4)                         | 64.9 (12.9)                               | 0.18                 | 0.001                |
| LA size (cm <sup>3</sup> )                       | 25.9 (6.8)       | 24.7 (7.5)                          | NA                                        | 0.400                | -                    |
| RVEF (%)                                         | 53.7 (8.5)       | 50.8 (14.6)                         | NA                                        | 0.273                | -                    |
| LGE+, n (%)                                      | 17 (54.8)        | 5 (12.5)                            | 97 (7.9) <sup>f</sup>                     | <0.001               | <0.001               |
| Native T1 (ms)                                   | 1033.7 (48.2)    | 994.5 (70.0) <sup>g</sup>           | 977.1 (41.6)                              | -                    | <0.001               |
| Max T2 (ms)                                      | 61.5 (4.8)       | 53.7 (4.3)                          | NA                                        | <0.001               | -                    |

Abbreviations: AF, atrial fibrillation; CAD, coronary artery disease; CMR, cardiac magnetic resonance imaging; CVD, cardiovascular disease; DM, diabetes mellitus; HTN, hypertension; LA, left atrial; LGE, late gadolinium enhancement; LVEDV, left ventricular end diastolic volume; LVEF, left ventricular ejection fraction; LVESV, left ventricular end systolic volume; MS, milliseconds; RVEF, right ventricular ejection fraction; VA, ventricular arrhythmia. MACE includes atrial fibrillation, ventricular arrhythmias, congestive heart failure, or sudden cardiac death. <sup>a</sup>Consecutive cancer patients (≥ 50 years of age) of similar cancer and traditional cardiac risk not treated with ibrutinib, imaged on the same CMR scanner. <sup>b</sup>Derived from a similar aged contemporary cohort, free of clinical CVD. <sup>c</sup>Comparison of ibrutinib users to non-ibrutinib treated cancer patients, using t-tests and fishers exact tests. <sup>d</sup>Comparison of ibrutinib users to non-ibrutinib treated general population cohort of similar age and traditional CVD risk, using z-tests. <sup>e</sup>Present before ibrutinib initiation. <sup>f</sup>Derived from (32); within the same population. <sup>g</sup>T1 maps were not consistently available.

**eTable 2.** Univariable predictors for subsequent arrhythmic (AF or VA) events, by cardiac magnetic resonance imaging parameter

| <b>Parameter</b>     | <b>Hazard Ratio</b> | <b>95% Confidence Interval</b> | <b>P-value</b> |
|----------------------|---------------------|--------------------------------|----------------|
| LGE                  | 5.28                | (1.15-24.29)                   | <b>0.032</b>   |
| Native T1, per 10 ms | 1.15                | (1.01-1.30)                    | <b>0.032</b>   |
| ECV, per 1%          | 1.12                | (0.96-1.32)                    | 0.153          |
| Max T2, per 1 ms     | 1.15                | (1.02-1.30)                    | <b>0.012</b>   |

Abbreviations: AF, atrial fibrillation; CI, confidence interval; ECV, extracellular volume fraction; LGE, late gadolinium enhancement; VA, ventricular arrhythmias.
